# Supplementary material
Source: PubMed Central journal article supplement (PMC3848389)
Supplement: CJN.00140113_CJN00140113SupplementaryData.pdf [file CJN.00140113_CJN00140113SupplementaryData.pdf]

**Supplemental Table 1.** Hazard ratios (95% confidence intervals) of all-cause death by weight and metabolic subtype categories stratified by race.

|                      | <i>Normal Weight</i><br>(BMI 18.5 to 24.9 kg/m <sup>2</sup> ) |                                    | <i>Overweight</i><br>(BMI 25 – 29.9 kg/m <sup>2</sup> ) |                                    | <i>Non-morbidly Obese</i><br>(BMI 30-39.9 kg/m <sup>2</sup> ) |                                    |
|----------------------|---------------------------------------------------------------|------------------------------------|---------------------------------------------------------|------------------------------------|---------------------------------------------------------------|------------------------------------|
|                      | <b>Metabolically<br/>Healthy</b>                              | <b>Metabolically<br/>Unhealthy</b> | <b>Metabolically<br/>Healthy</b>                        | <b>Metabolically<br/>Unhealthy</b> | <b>Metabolically<br/>Healthy</b>                              | <b>Metabolically<br/>Unhealthy</b> |
|                      |                                                               |                                    |                                                         |                                    |                                                               |                                    |
| N (white/black)      | 520/257                                                       | 120/58                             | 461/310                                                 | 445/307                            | 162/263                                                       | 688/310                            |
| Model 1 <sup>a</sup> |                                                               |                                    |                                                         |                                    |                                                               |                                    |
| Whites               | 1.0 (ref)                                                     | 1.49 (0.99-2.23)                   | 0.79 (0.58-1.09)                                        | 0.85 (0.62-1.16)                   | 0.73 (0.45-1.18)                                              | 0.79 (0.58-1.09)                   |
| Blacks               | 1.0 (ref)                                                     | 1.26 (0.74-2.15)                   | 0.46 (0.31-0.69)                                        | 0.68 (0.47-0.97)                   | 0.37 (0.24-0.59)                                              | 0.53 (0.37-0.75)                   |
| Model 2 <sup>b</sup> |                                                               |                                    |                                                         |                                    |                                                               |                                    |
| Whites               | 1.0 (ref)                                                     | 1.40 (0.94-2.11)                   | 0.81 (0.59-1.11)                                        | 0.86 (0.63-1.18)                   | 0.99 (0.61-1.61)                                              | 1.05 (0.77-1.44)                   |
| Blacks               | 1.0 (ref)                                                     | 1.39 (0.81-2.38)                   | 0.52 (0.35-0.78)                                        | 0.81 (0.56-1.16)                   | 0.53 (0.33-0.83)                                              | 0.84 (0.61-1.16)                   |
| Model 3 <sup>c</sup> |                                                               |                                    |                                                         |                                    |                                                               |                                    |
| Whites               | 1.0 (ref)                                                     | 1.15 (0.76-1.75)                   | 0.87 (0.63-1.21)                                        | 0.79 (0.57-1.09)                   | 0.99 (0.60-1.66)                                              | 1.03 (0.77-1.38)                   |
| Blacks               | 1.0 (ref)                                                     | 1.26 (0.72-2.20)                   | 0.57 (0.37-0.88)                                        | 0.77 (0.53-1.13)                   | 0.62 (0.39-0.99)                                              | 0.79 (0.58-1.09)                   |

<sup>a</sup>Unadjusted; <sup>b</sup>Adjusted for age, sex and geographic region of residence; <sup>c</sup>Adjusted for age, race, sex, geographic region of residence, educational achievement, annual family income, physical activity, tobacco usage, history of coronary heart disease and stroke, estimated glomerular filtration rate and natural log-transformed urinary albumin to creatinine ratio

**Supplemental Table 2.** Hazard ratios (95% confidence intervals) of all-cause death by weight and metabolic subtype categories with the obese category further subdivided into morbid and non-morbid obesity categories.

|                      | <i>Normal Weight</i><br>(BMI 18.5 to 24.9 kg/m <sup>2</sup> ) |                                    | <i>Overweight</i><br>(BMI 25 – 29.9 kg/m <sup>2</sup> ) |                                    | <i>Non-morbidly Obese</i><br>(BMI 30-39.9 kg/m <sup>2</sup> ) |                                    |                   |
|----------------------|---------------------------------------------------------------|------------------------------------|---------------------------------------------------------|------------------------------------|---------------------------------------------------------------|------------------------------------|-------------------|
|                      | <b>Metabolically<br/>Healthy</b>                              | <b>Metabolically<br/>Unhealthy</b> | <b>Metabolically<br/>Healthy</b>                        | <b>Metabolically<br/>Unhealthy</b> | <b>Metabolically<br/>Healthy</b>                              | <b>Metabolically<br/>Unhealthy</b> |                   |
|                      | N                                                             | 777                                | 178                                                     | 771                                | 752                                                           | 381                                | 1178              |
| Model 1 <sup>a</sup> | 1.0 (ref)                                                     | 1.39 (1.01,1.92)                   | 0.65 (0.51, 0.84)                                       | 0.79 (0.62, 1.00)                  | 0.55 (0.39, 0.77)                                             | 0.66 (0.53, 0.83)                  | 0.66 (0.53, 0.83) |
| Model 2 <sup>b</sup> | 1.0 (ref)                                                     | 1.40 (1.01, 1.93)                  | 0.68 (0.53, 0.87)                                       | 0.85 (0.67, 1.08)                  | 0.71 (0.50, 1.00)                                             | 0.89 (0.71, 1.13)                  | 0.89 (0.71, 1.13) |
| Model 3 <sup>c</sup> | 1.0 (ref)                                                     | 1.17 (0.84, 1.63)                  | 0.74 (0.57, 0.96)                                       | 0.79 (0.62, 1.01)                  | 0.78 (0.55, 1.12)                                             | 0.84 (0.66, 1.07)                  | 0.84 (0.66, 1.07) |

<sup>a</sup>Unadjusted; <sup>b</sup>Adjusted for age, sex and geographic region of residence; <sup>c</sup>Adjusted for age, race, sex, geographic region of residence, educational achievement, annual family income, physical activity, tobacco usage, history of coronary heart disease and stroke, estimated glomerular filtration rate and natural log-transformed urinary albumin to creatinine ratio
